# Supplementary material for: Enhancement of A Cationic Surfactant by Capping Nanoparticles: Synthesis, Characterization and Multiple Applications
Source: PubMed Central journal article supplement (PMC7249094; doi:10.3390/molecules25092007), 2020-04-25
Supplement: molecules-25-02007-s001.pdf [file molecules-25-02007-s001.pdf]

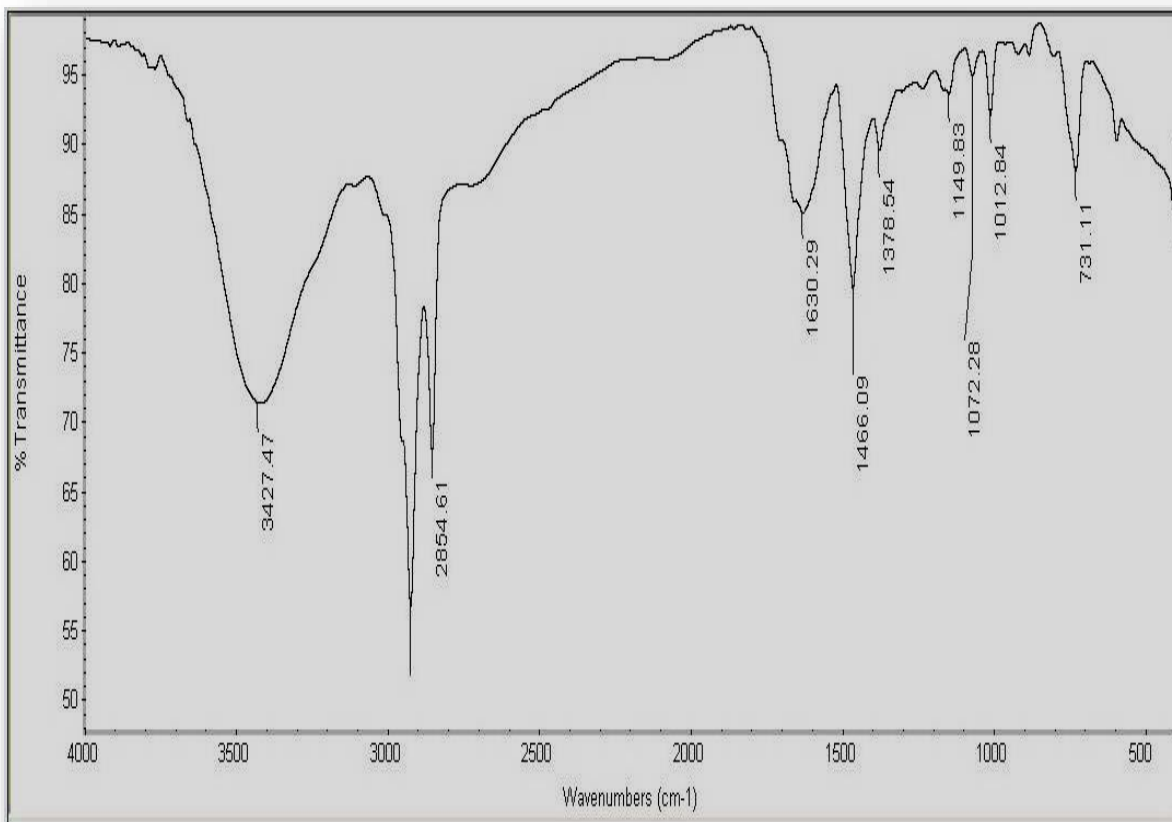

**Figure S1.** FT-IR spectrum of (Z)-2-((1-methyl-1-dodecylpyrrolidin-1-ium-2-ylidene)amino)ethan-1-ol bromide.

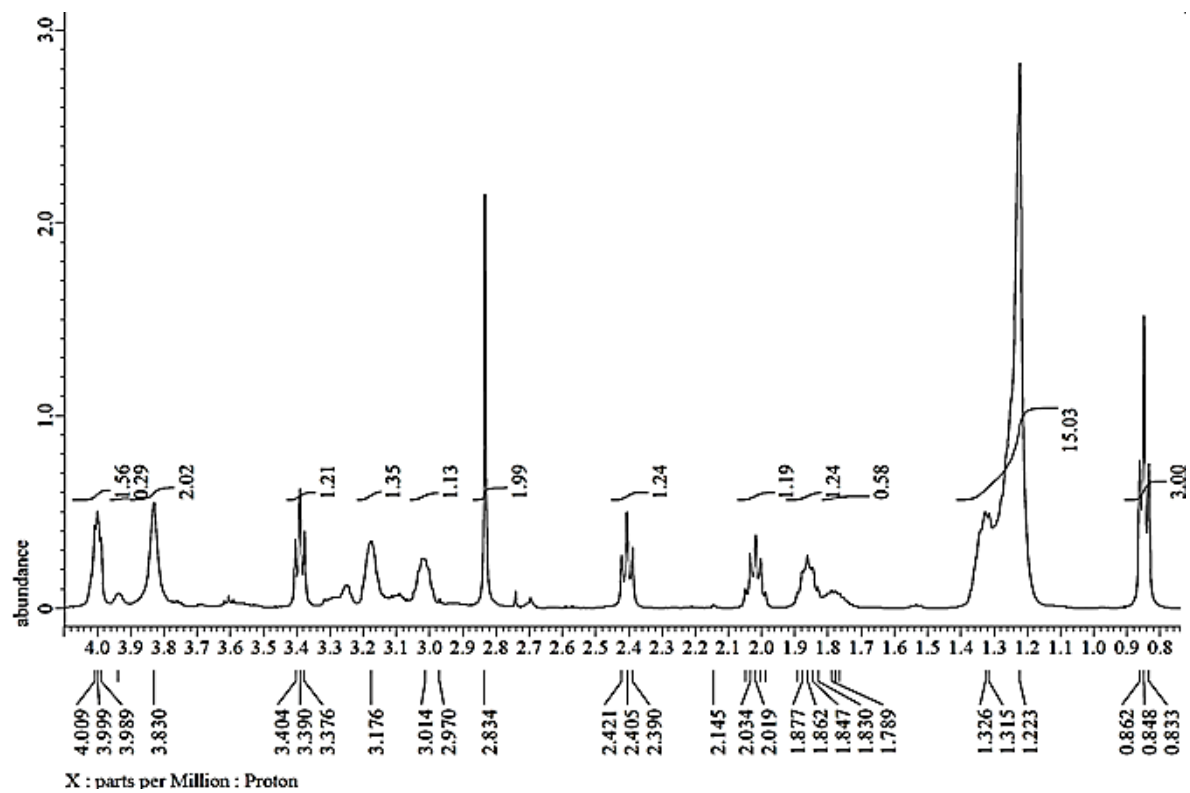

Figure S2.  $^1\text{H}$  NMR spectrum of (Z)-2-((1-methyl-1-dodecylpyrrolidin-1-ium-2-ylidene)amino)ethan-1-ol bromide.

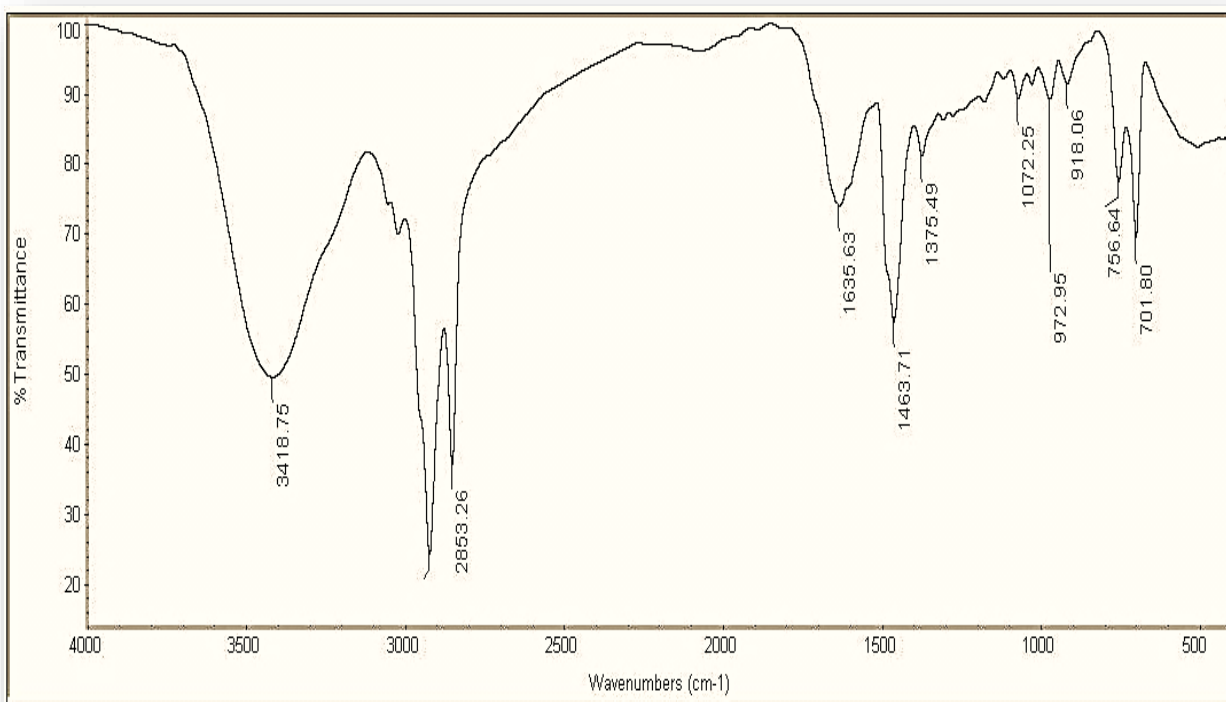

**Figure S3.** FT-IR spectrum of the Zinc nanoparticles capped by the CS; (Z)-2-((1-methyl-1-dodecylpyrrolidin-1-ium-2-ylidene)amino)ethan-1-ol bromide.
